# Supplementary material for: Patchable Transparent Standalone Piezoelectric P(VDF-TrFE) Film for Radial Artery Pulse Detection
Source: Hindawi journal article supplement (doi:10.1155/2023/2213988), 2023-11-24
Supplement: f1 [file 2213988.f1.doc]

**Supporting Information**

**Patchable Transparent Standalone Piezoelectric P(VDF-TrFE) Film for Radial Artery Pulse Detection**

Yian Hua,‡, Shunyao Huanga,‡, Yujia Gaoa,‡, Jaeyeon Leeb, Zhangsiyuan Jina, Geon-Hyoung Anb,c,*, Yuljae Choa,*

aUM-SJTU Joint Institute, Shanghai Jiao Tong University, Shanghai 200240, China

bDepartment of Energy System Engineering, Gyeongsang National University, Jinju, Gyeongnam 52725, Republic of Korea

cDepartment of Energy Engineering, Gyeongsang National University, Jinju, Gyeongnam 52725, Republic of Korea

Keywords: Solvent vapor annealing; Piezoelectricity; Piezoelectric nanogenerators; Piezoelectric biosensors; Radial artery pulses.

**Figure S1**. FTIR peaks of SA-TrFE in red and TA-TrFE in blue, respectively. The peaks corresponding to the β-phase and α-phase are denoted in orange and dark cyon color, respectively.

TA-TrFE with peak intensity at α-phase 763 cm−1 = 0.0905

TA-TrFE with peak intensity at β-phase 981 cm−1 = 0.538

SA-TrFE with peak intensity at α-phase 763 cm−1 = 0.0804

SA-TrFE with peak intensity at β-phase 981 cm−1 = 0.546


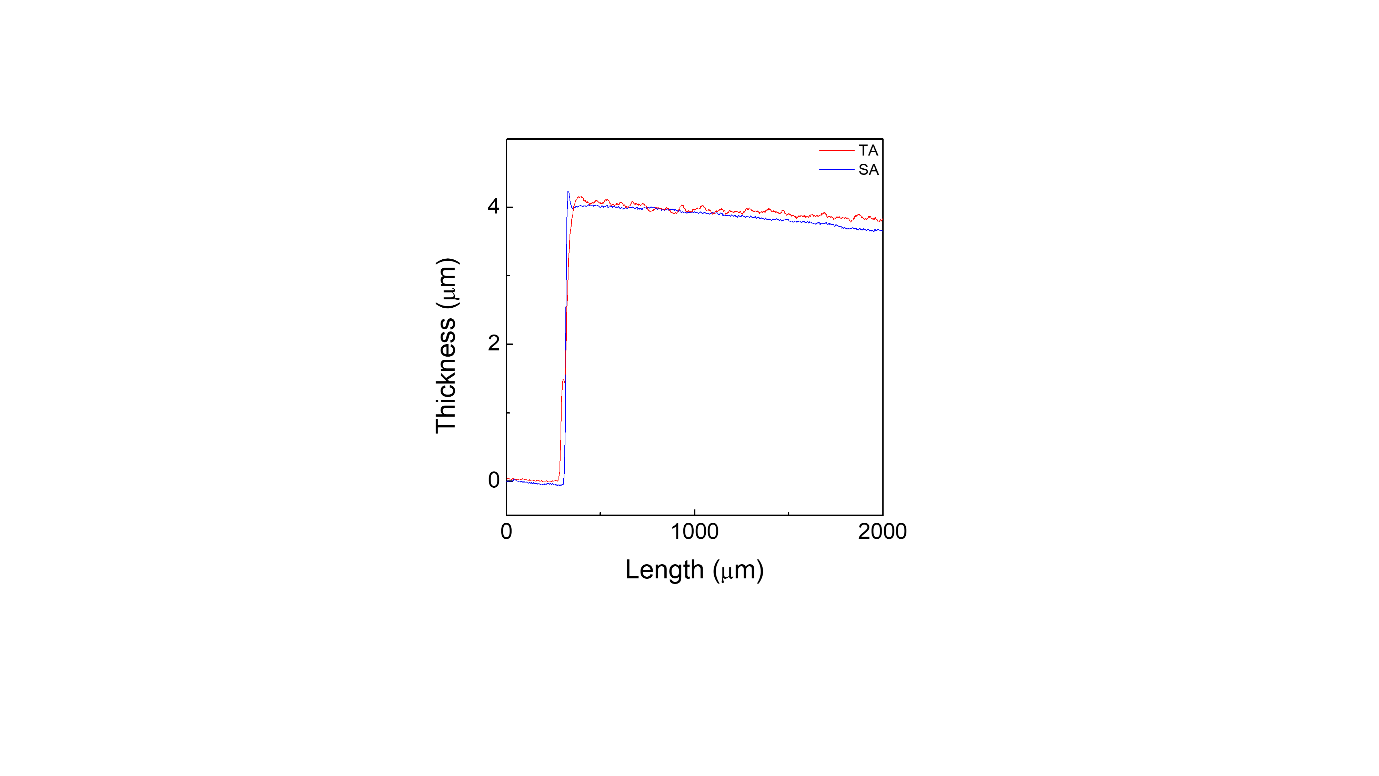


**Figure S2.** Thicknesses of SA-TrFE and TA-TrFE films measured by Dektak.

***
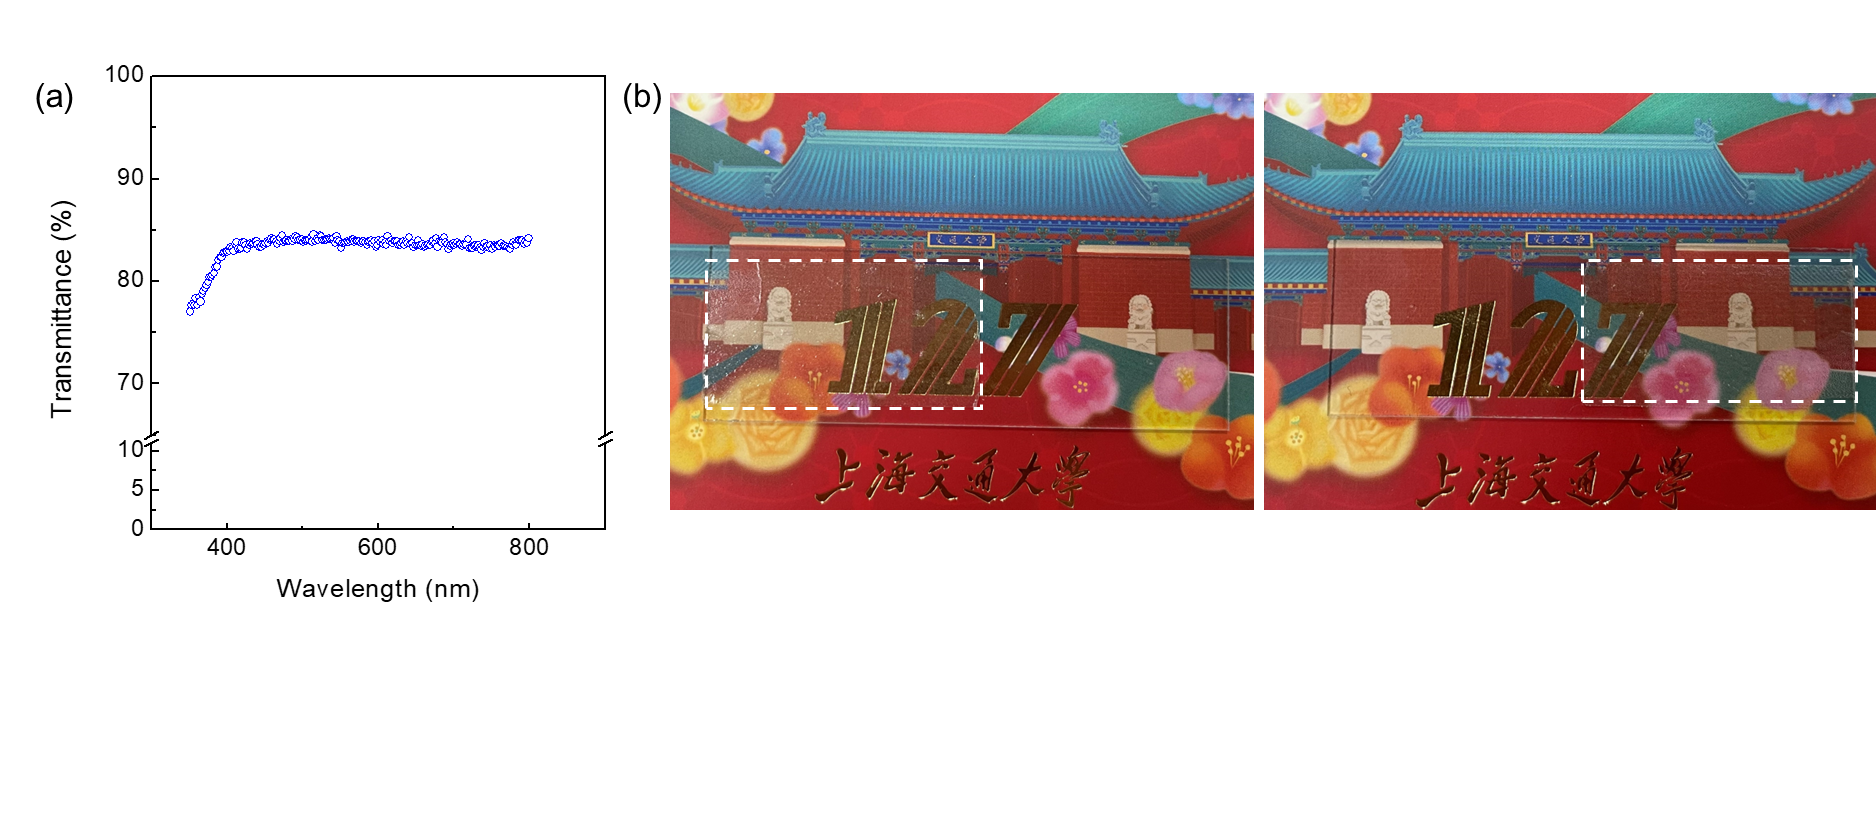
***

**Figure S3**. (a) Transmittance of the adhesive conductive electrode on a glass substrate. (b) Digital images to compare two regions with (i) the adhesive conductive electrode on the glass substrate marked in a white dashed line and (ii) bare glass.


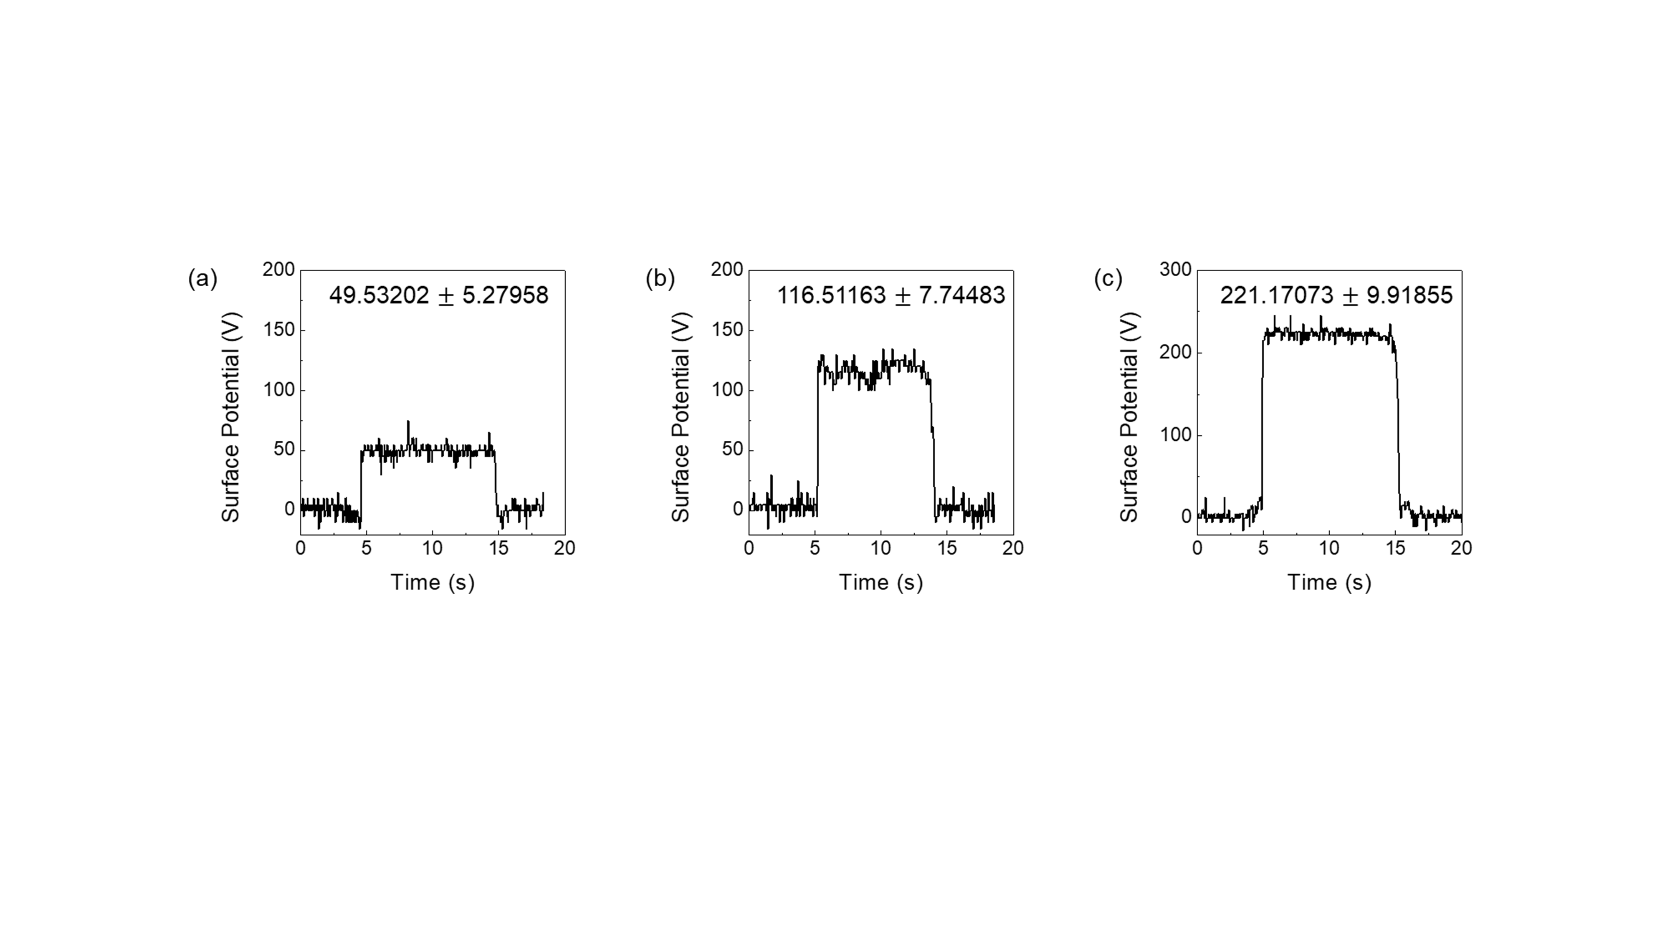


**Figure S4**. Surface potential of P(VDF-TrFE) films. (a) as-coated; (b) thermal annealing (TA); and (c) solvent vapor annealing and dried (SA).


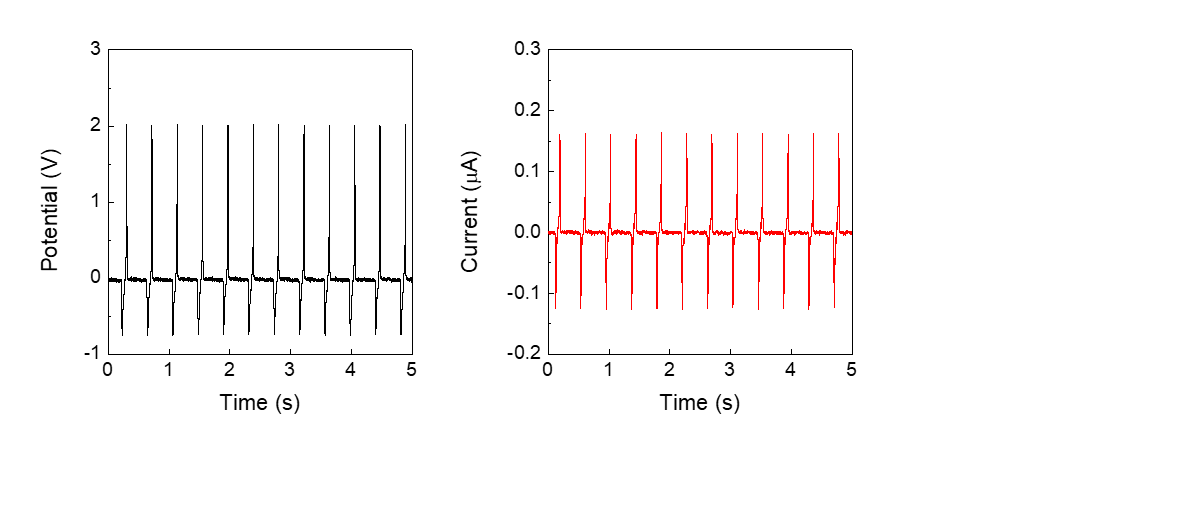


**Figure S5**. I-V characteristics of the piezoelectric biosensor, revealing that the impedance of the device is 9.5 MΩ by Ohm’s law.

***
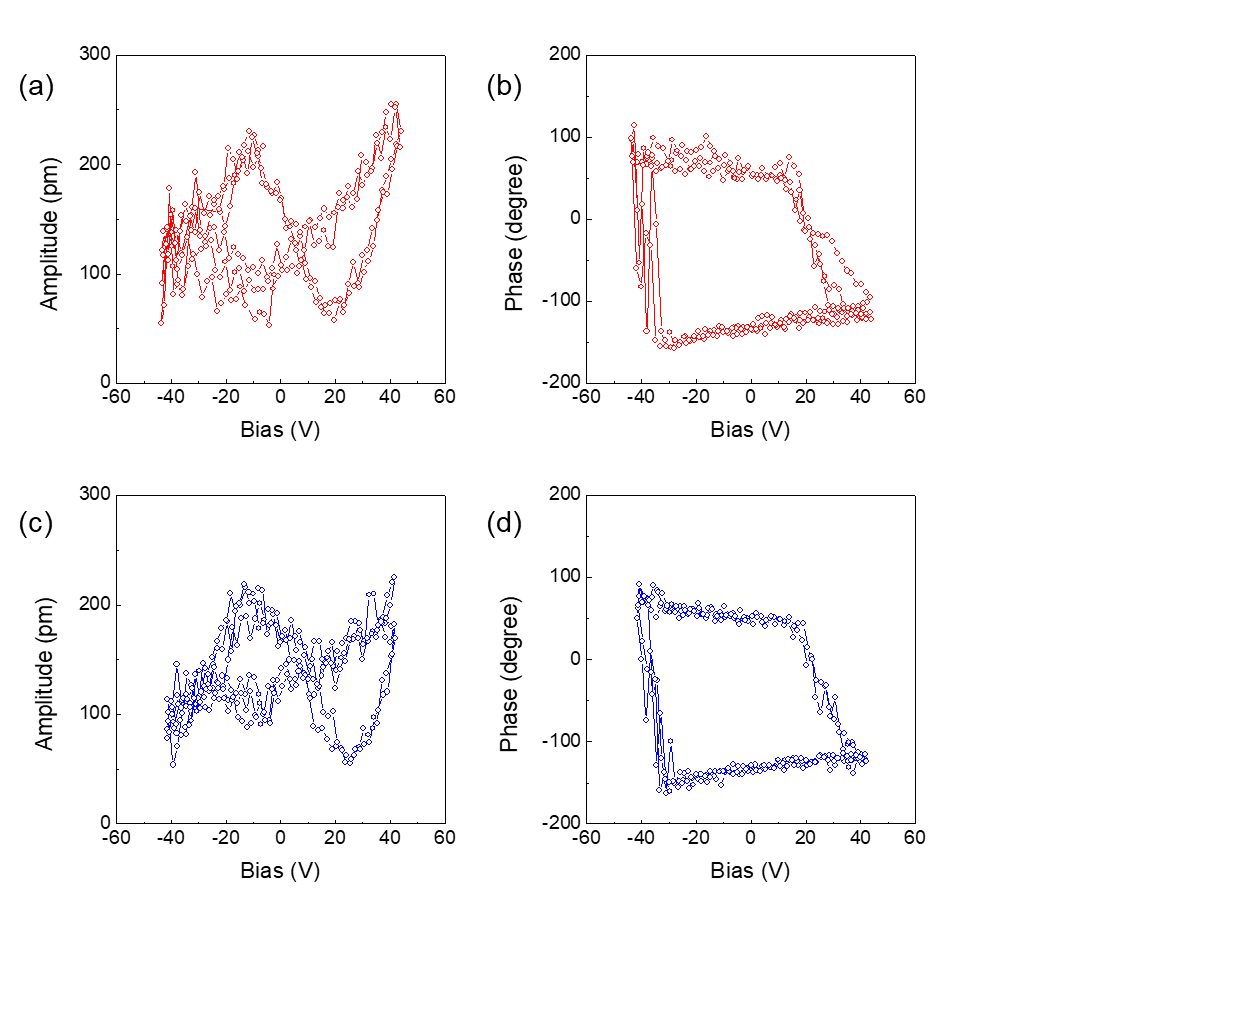
***

**Figure S6.** PFM amplitude and phase images of (a), (b) SA-TrFE and (c), (d) TA-TrFE.


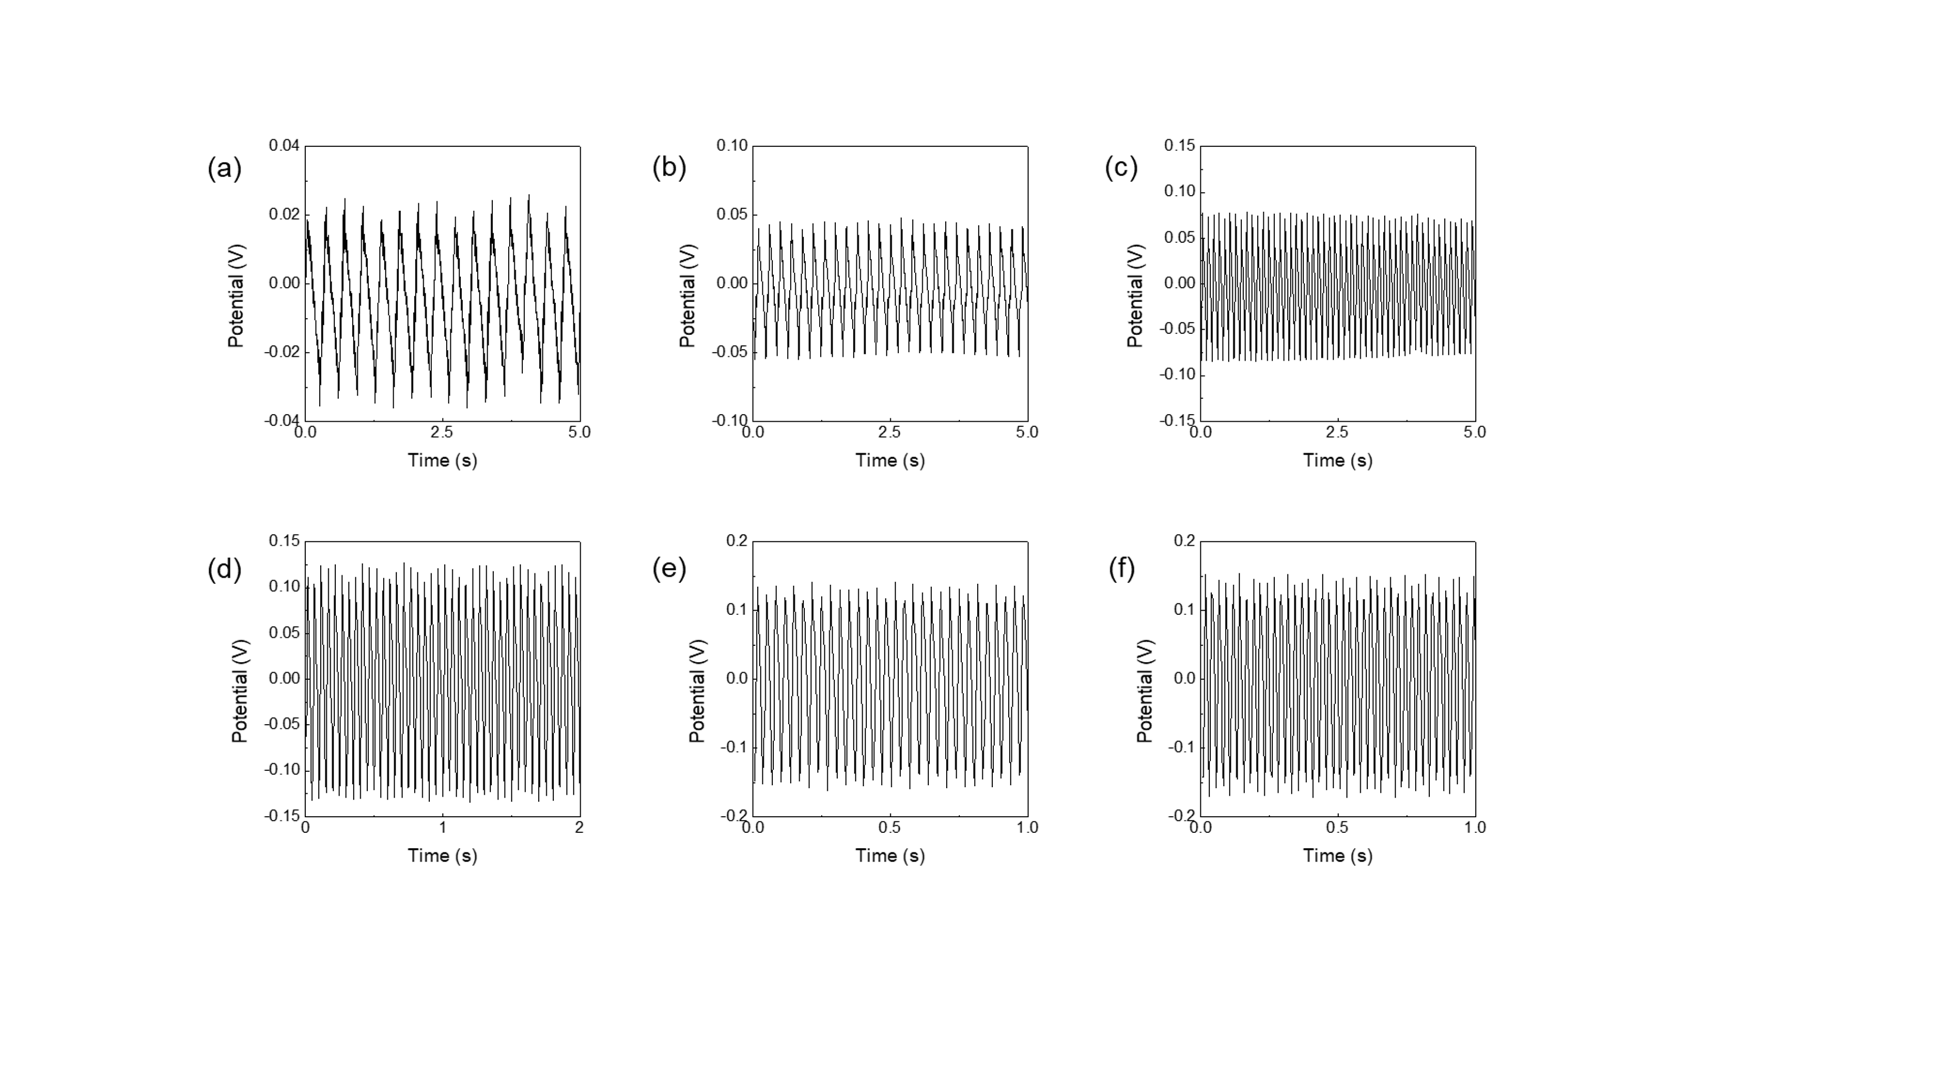


**Figure S7**. Characterization of piezoelectric response under relatively low frequencies by fabricating piezoelectric nanogenerators. (a) 3, (b) 5, (c) 10, (d) 20, (e) 30, and (f) 40 Hz.

Relatively low output potential is due to the vertical direction of applied external force. The horizontal mode (31 mode) generally produces high output piezoelectric potential compared to the vertical mode (33 mode) due to the nature of piezoelectric coefficient.


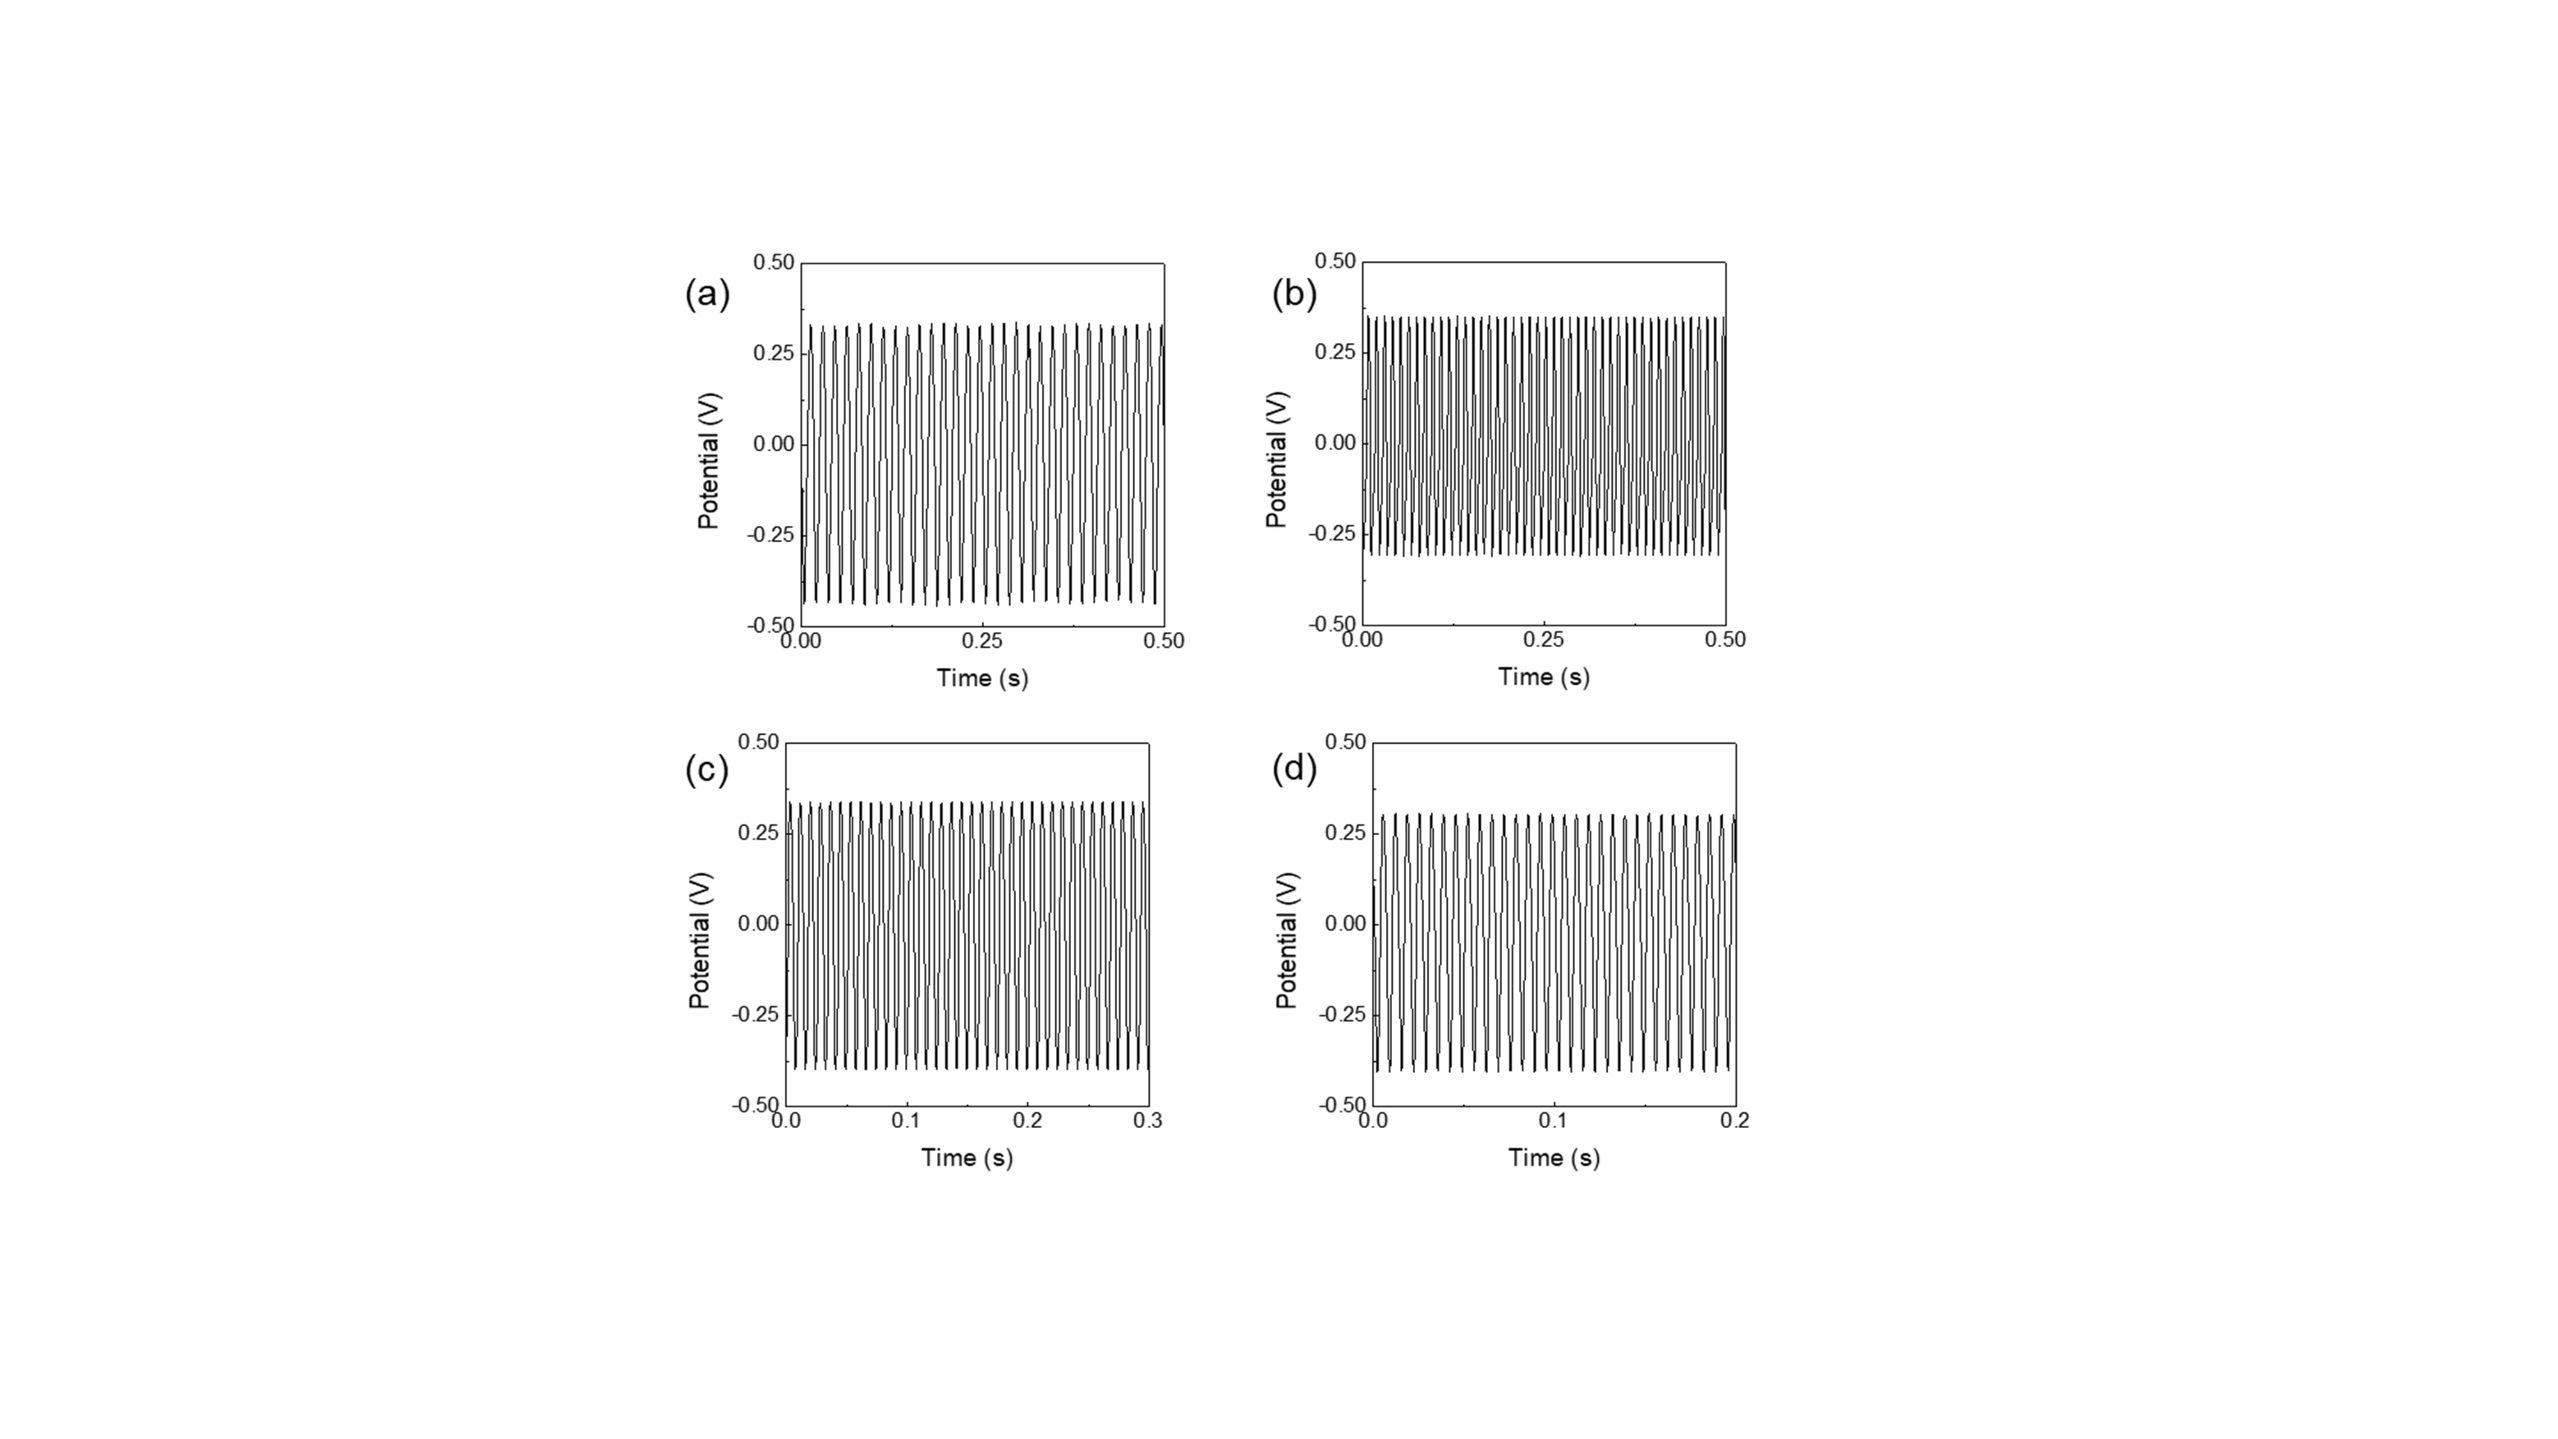


**Figure S8.** Characterization of piezoelectric response under relatively high frequencies by fabricating piezoelectric nanogenerators. (a) 60, (b) 90, (c) 120, (d) 150 Hz.

Slight fluctuation of piezoelectric output response in **Figure S7** and **Figure S8** is due to the fluctuation of the input force by the linear motor.


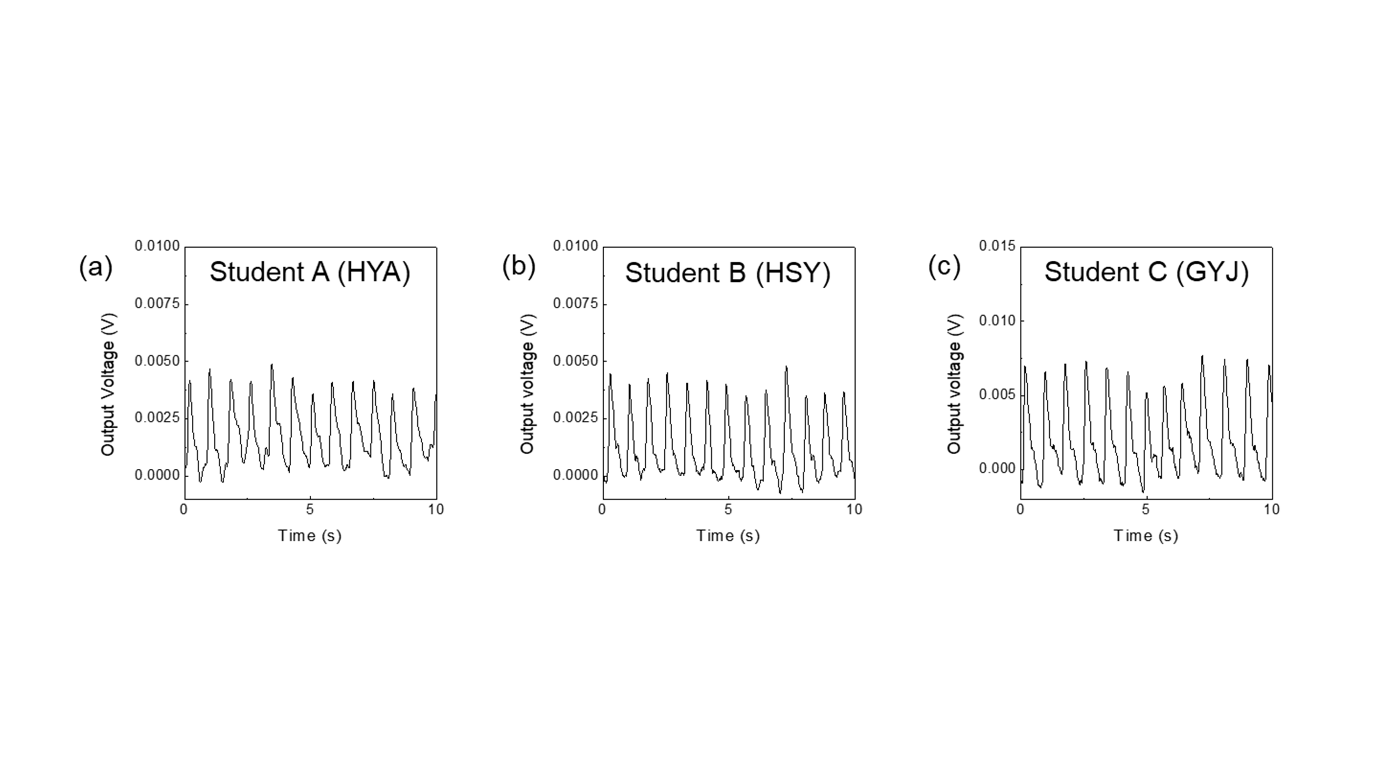


**Figure S9.** Output responses of RAPS based on MEK by measuring radial artery pulses of three volunteers.


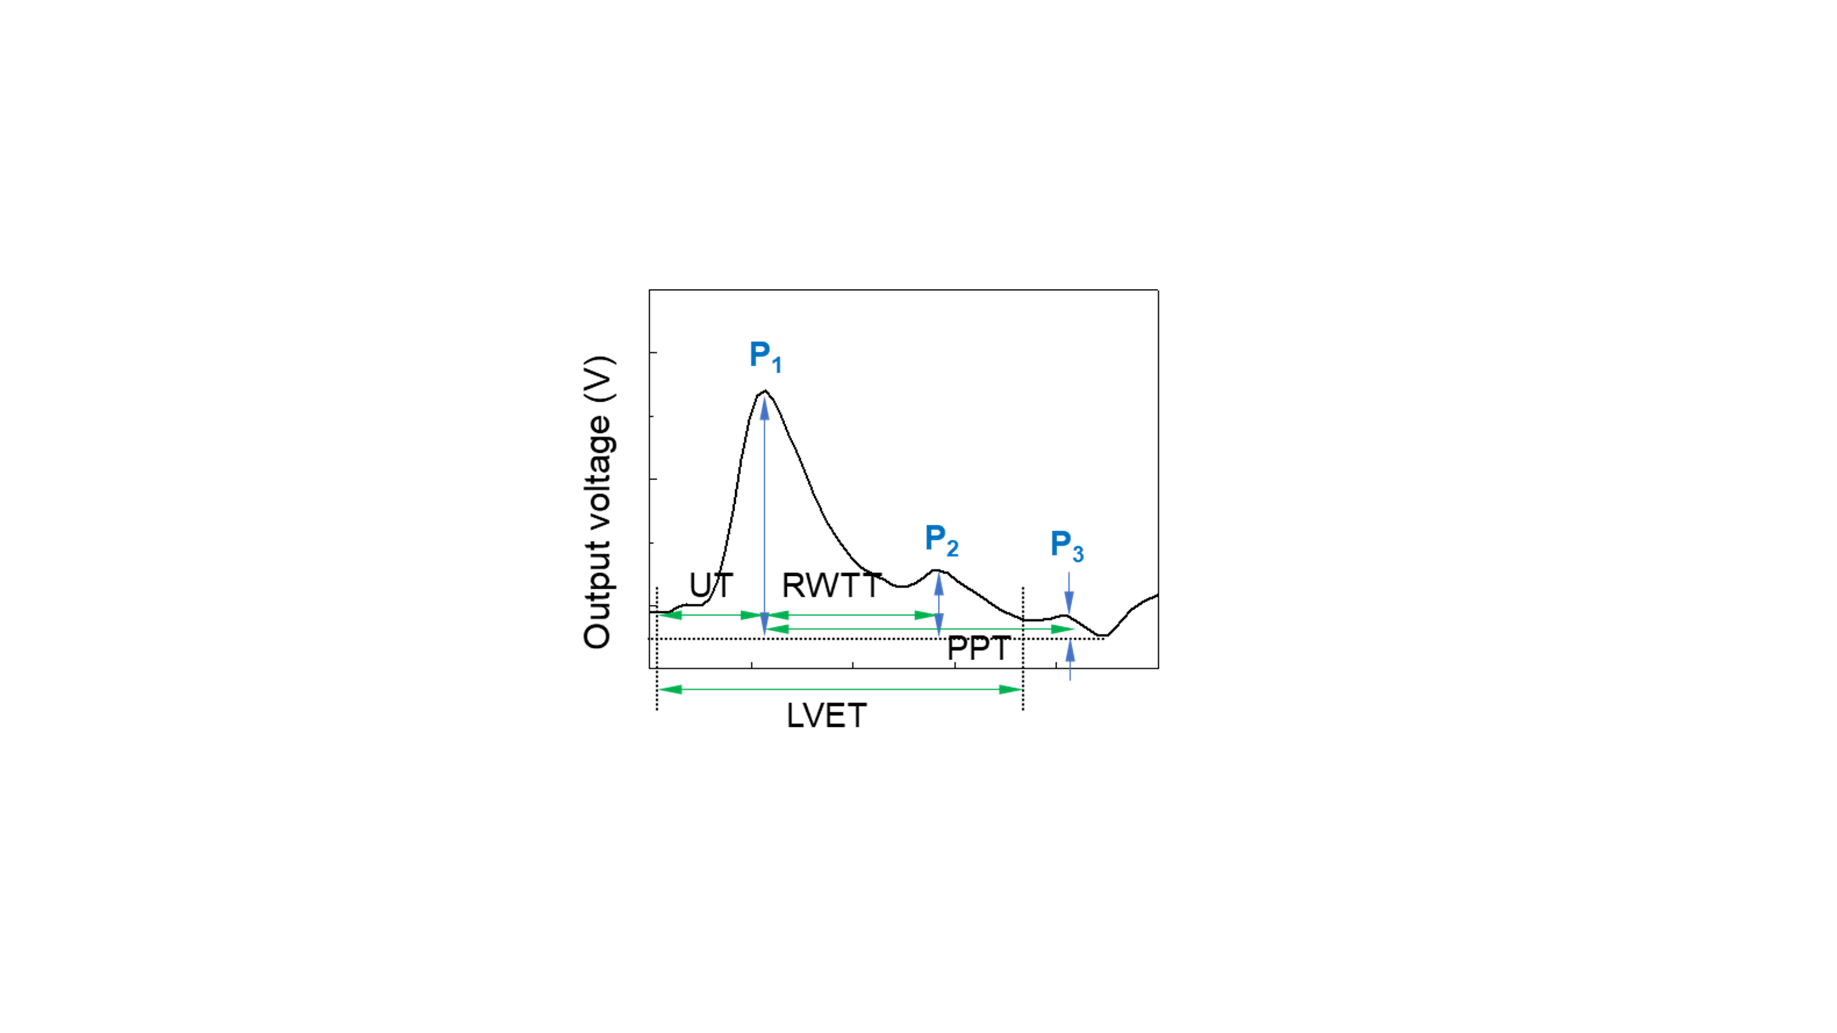


**Figure S10.** Output response of RAPS generated by the radial artery pulse wave, and various physiological information which can be attained by the output response.

**Upstroke time (UT)** indicates the required time for the upstroke of the pulse wave to reach the systolic peak. A higher UT value means lower elasticity, i.e. greater stiffness, of aorta.

**Reflected wave transit time (RWTT)** is known as the return time and is the difference between the initial and reflected systolic wave peaks.

**PPT** is the time difference between the early systolic peak (P1) and the early diastolic peak (P3) of the pressure wave.

**Left ventricular ejection time (LVET)** is the time difference between the opening and closing of the aortic valve which reflects the cardiac function of the systolic and diastolic capacities.

**Augmentation index (AI)** is a measure of systemic arterial stiffness derived from the upstroke aortic pressure waveform. It is calculated as the difference between P2 and P1 as shown below. Since the aortic pressure pulse wave consists of three waveforms of systolic upstroke wave (P1), reflection wave (P2), and dicrotic wave (P­3), the position of the reflection point is mainly related to the stiffness of the blood vessel.[1-3]


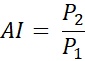


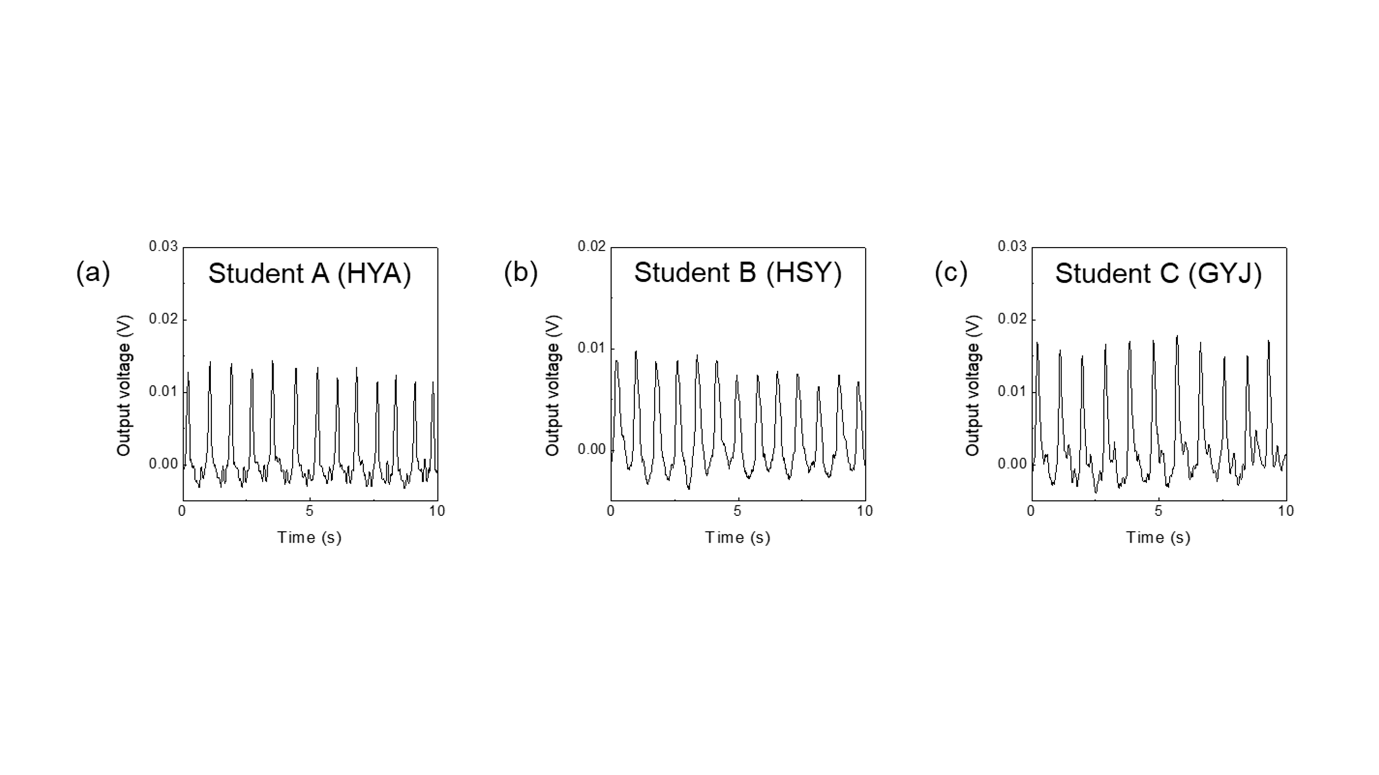


**Figure S11.** Output responses of RAPS based on DMF by measuring radial artery pulses of three volunteers.


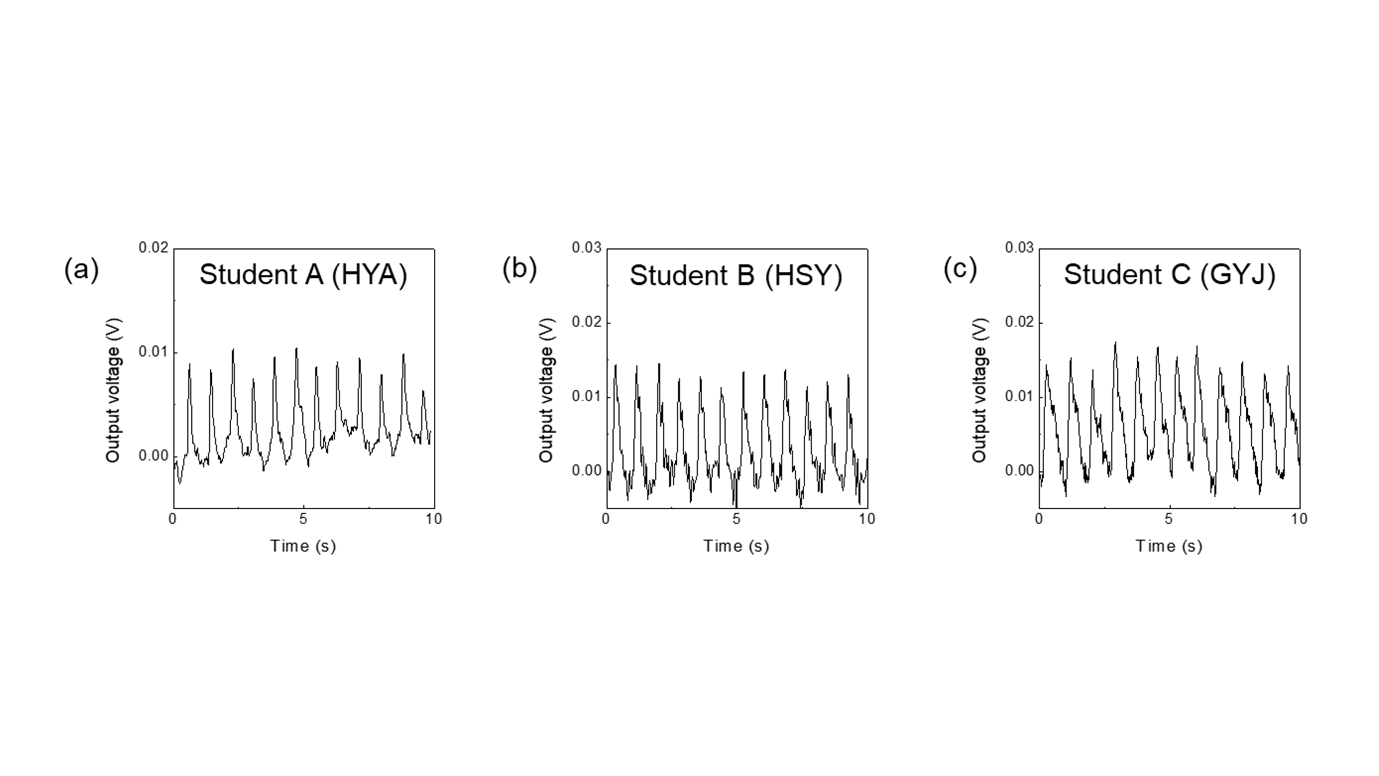


**Figure S12.** Output responses of RAPS based on DMSO by measuring radial artery pulses of three volunteers.

**Figure S13**. The long-term stability of the piezoelectric biosensor in the 2M NaCl solution for the accelerated aging test.

**Table S1.** Performance comparison of piezoelectric biosensors for various applications.

| **Materials** | **Dimensions [cm2]** | **Applied force** | **Output [mV]** | **Sensitivity [V/N]** | **Application** | **Ref** |
| --- | --- | --- | --- | --- | --- | --- |
| P(VDF-TrFE) film | 1.5 by1.5 | arterial pressure | 15 | ~0.0016 V/kPa | radial artery pulse detection | This work |
| Ni-MOF/PVDF nanofiber  + nylon nanofibers | 2.5 by 2.5 | - | - | 2.4 | monitor arterial pulse and body movements | [4] |
| PVDF nanofiber | 2.0 by 1.5 | 5 N | 408 | 0.082 | radial artery pulse detection | [5] |
| PVDF film | - | arterial pressure | 2.5 [a.u.] | - | radial artery pulse detection system | [6] |
| P(VDF-TrFE) nanofibers | 4.0 by 4.0 | 1.5 N | 52.1 | 0.102 | throat vibration and wrist arterial pulse monitoring | [7] |
| PVDF/DA nanofibers | - | Carotid artery | 900 | - | radial artery pulse detection | [8] |
| PVDF/ZnO nanofibers | - | arterial pressure | 75 [pA] | 0.0031 V/kPa | radial artery pulse detection and gait recognition | [9] |
| PANI-PVDF nanofibers | - | arterial pressure | 5 | 0.8 V/kPa | vital signal detection/voice recognition systems | [10] |
| P(VDF-TrFE) + supercapacitor | - | 8 N | 200 | 0.031 kPa-1 | Carotid artery monitoring, blood pressure detection,  and CVD diagnosis | [11] |

**Reference**

1. S. Chen, N. Wu, S. Lin, J. Duan, Z. Xu, Y. Pan, H. Zhang, Z. Xu, L. Huang, B. Hu, J. Zhou, *Nano Energy* 2020, **70**, 104460.

2. K. Meng, J. Chen, X. Li, Y. Wu, W. Fan, Z. Zhou, Q. He, X. Wang, X. Fan, Y. Zhang, J. Yang, Z. L. Wang, *Adv. Funct. Mater*. 2019, **29**, 1806388.

3. G. Chen, C. Au, J. Chen, *Trends Biotechnol*. 2021, **39**, 1078-1092.

4. N. K. Das, M. Ravipati, S. Badhulika, *Adv. Funct. Mater.* 2023, **33**, 2303288.

5. B. H. Moghadam, M. Hasanzadeh, A. Simchi, *ACS Appl. Nano Mater.* 2020, **3**, 8742.

6. B Zhou, X Wang, Q Li, C Qiu, J He, Y Zhu, H Wang, *Journal of Physics: Conference Series* 2021, **1924**, 012019.

7. D. W. Huang, J. L. Liu, C. T. Kuo. *6th International Symposium on Computer, Consumer and Control (IEEE)*, 2023, 17-19.

8. T. Li, M. Qu, C. Carlos, L. Gu, F. Jin, T. Yuan, X. Wu, J. Xiao, T. Wang, W. Dong, X. Wang, Z. Q. Feng, *Adv. Mater.* 2021, **33**, 2006093.

9. T. Yang, H. Pan, G. Tian, B. Zhang, D. Xiong, Y. Gao, C. Yan, X. Chu, N. Chen, S. Zhong, L. Zhang, W. Deng, W. Yang, *Nano Energy* 2020, **72**, 104706.

10. K. Maity, S. Garain, K. Henkel, D. Schmeißer, D. Mandal, *ACS Appl. Polym. Mater.* 2020, **2**, 862.

11. H. -J. Kil, J. -W. Park, *Nano Energy* 2023, **114**, 108636.
